# Supplementary material for: Generation of a mutator parasite to drive resistome discovery in Plasmodium falciparum
Source: PubMed Central journal article supplement (PMC10224993; doi:10.1038/s41467-023-38774-1), 2023-05-27
Supplement: 41467_2023_38774_MOESM1_ESM.pdf [file 41467_2023_38774_MOESM1_ESM.pdf]

## **Supplementary Information**

### **Generation of a mutator parasite to drive resistome discovery in**

#### ***Plasmodium falciparum***

Krittikorn Kümpornsin, Theerarat Kochakarn, Tomas Yeo, John Okombo, Madeline R Luth, Johanna Hoshizaki, Mukul Rawat, Richard D Pearson, Kyra A Schindler, Sachel Mok, Heekuk Park, Anne-Catrin Uhlemann, Gouranga P. Jana, Bikash C. Maity, Benoît Laleu, Elodie Chenu, James Duffy, Sonia Moliner Cubel, Virginia Franco, Maria G Gomez-Lorenzo, Francisco Javier Gamo, Elizabeth A Winzeler, David A Fidock, Thanat Chookajorn, Marcus CS Lee

**1. Supplementary Methods**

**2. Supplementary Figures**

**3. Supplementary Tables**

## 1. Supplementary Methods

The following compounds were synthesised.

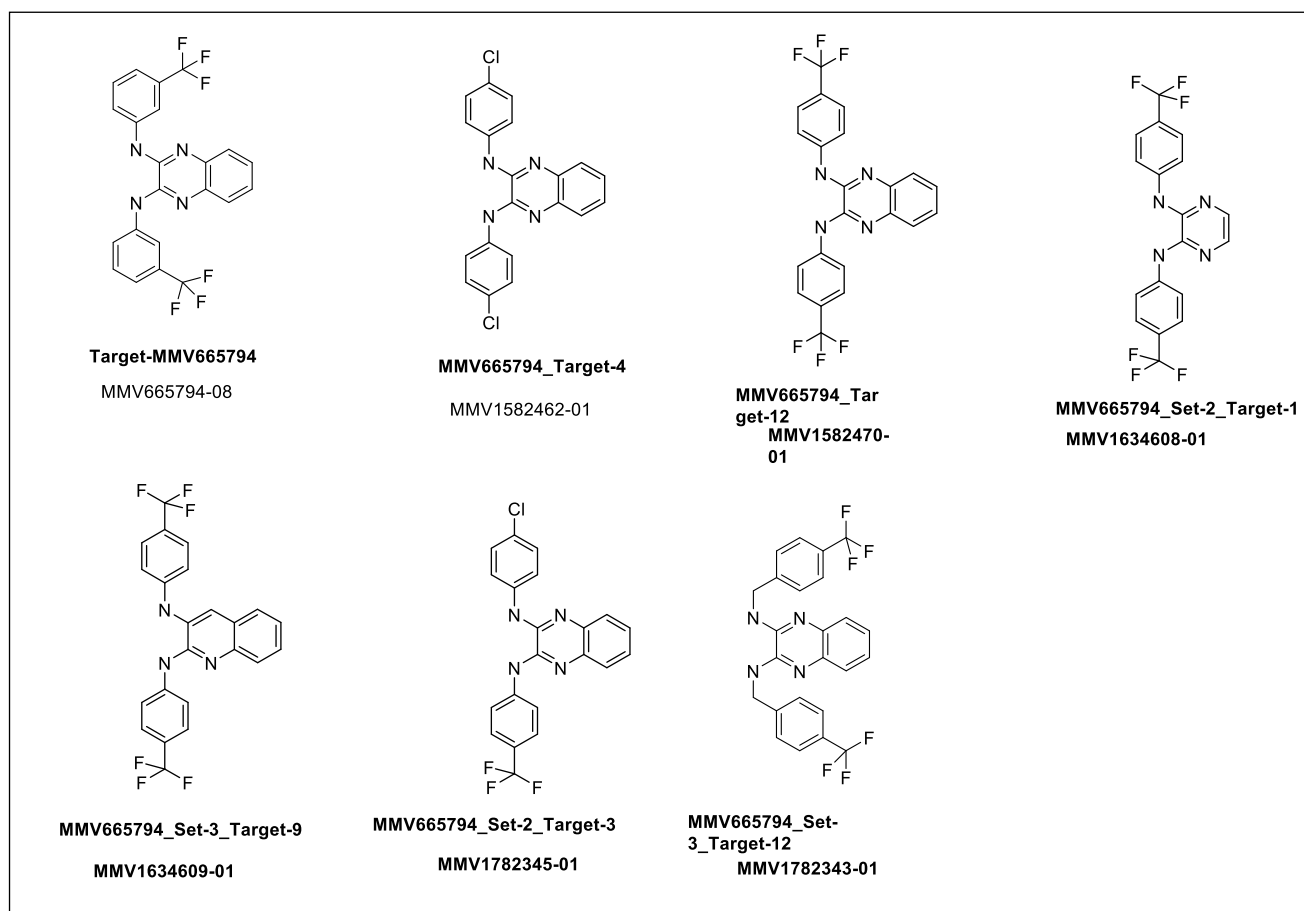

The following compounds were purchased. MMV1582455 from Princeton BioMolecular Research, LQZ-7I, BQR695 and KDU691 from Cambridge Bioscience, STK389043, STK996213 and STL326058 from MolPort. Structures of these compounds are shown in Supplementary Figure 9.

### General procedures for compound synthesis

All the starting materials and solvents were procured from commercial sources or synthesized according to the literature procedure. Organic solutions were dried over anhydrous sodium sulfate.

### <sup>1</sup>H NMR Spectroscopy

<sup>1</sup>H NMR was recorded at 400.20 & 400.10, 400.17 respectively, on a Bruker Avance II & III spectrometer, using solvents from Merck Laboratories. Chemical shifts ( $\delta$ , ppm) are reported

relative to the solvent peak (CDCl<sub>3</sub>: 7.25 [1H], DMSO-d<sub>6</sub>: 2.50 [1H]). Proton resonances are annotated as: chemical shift ( $\delta$ ), multiplicity (s, singlet; d, doublet; t, triplet; q, quartet; m, multiplet; br, broad), coupling constant (J, Hz), and number of protons.

### Synthesis of Target-MMV665794

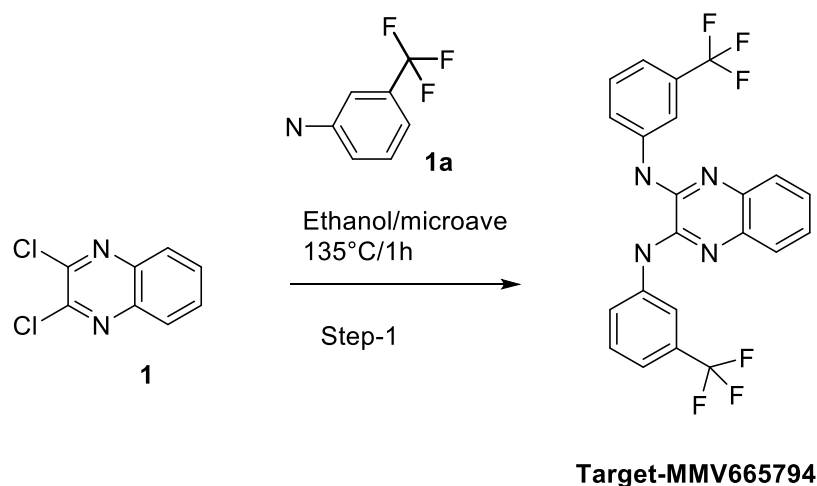

To a solution of 2,3-dichloroquininoxaline (**1**) (100 mg, 0.503 mmol) in ethanol (5 ml) was added 3-(trifluoromethyl)aniline (**1a**) (404.52 mg, 2.51 mmol) in a microwave vial at 25°C and the resulting reaction was allowed to stir at 135°C for 1h under microwave irradiation. After consumption of starting material, reaction mixture was concentrated in vacuum to provide a crude residue. The crude residue was purified using column chromatography on silica gel using 30% CH<sub>2</sub>Cl<sub>2</sub> in hexane as eluents to afford N<sub>2</sub>,N<sub>3</sub>-bis[3-(trifluoromethyl)phenyl]quininoxaline-2,3-diamine (**Target-MMV665794**) (35 mg, 16%) as a white solid.

### Synthesis of MMV665794\_Target-4 (MMV1582462-01)

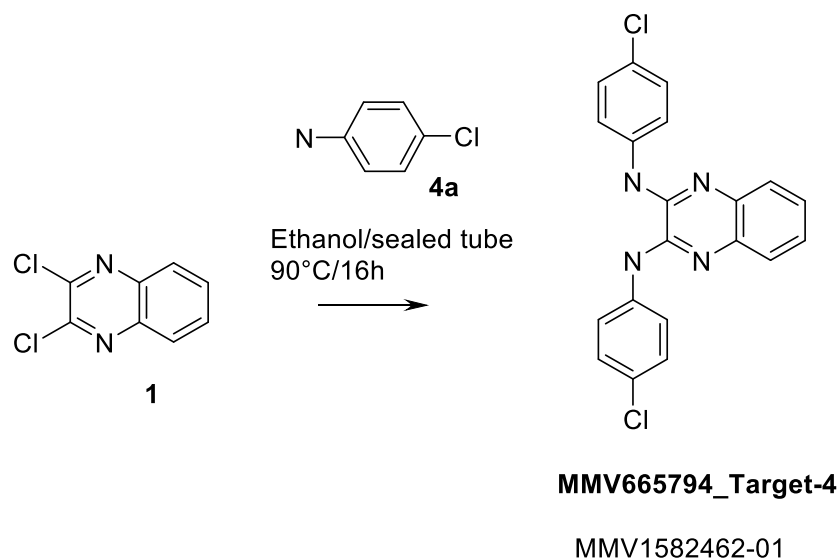

To a stirred solution of 2,3-dichloroquinoxaline (**1**) (100 mg, 0.502 mmol) in ethanol (5 ml) was added 4-chloroaniline (**4a**) (330 mg, 2.58 mmol) in a sealed tube at 25°C and the resulting reaction was allowed to stir at 90°C for 16h. After consumption of starting material (monitor by TLC), mixture was concentrated in vacuum to provide a crude residue. The crude residue was purified using column chromatography on silica gel using 3% MeOH in CH<sub>2</sub>Cl<sub>2</sub> as eluents to get afford N<sub>2</sub>,N<sub>3</sub>-bis(4-chlorophenyl)quinoxaline-2,3-diamine (**MMV665794\_Target-4**) (62 mg, 31%) as a white solid.

### Synthesis of MMV665794\_Target-12 (MMV1582470-01)

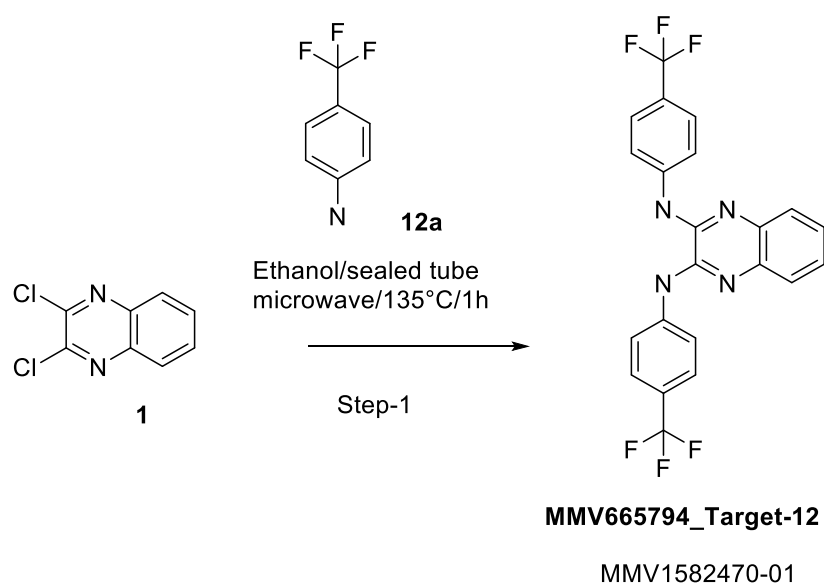

To a stirred solution of 2,3-dichloroquinoxaline (**1**) (199 mg, 1.00 mmol) in ethanol (5 ml) was added 4-(trifluoromethyl)aniline (**12a**) (805 mg, 5.0 mmol) in a microwave vial at 25°C and the resulting reaction was allowed to stir at 135°C for 1h under microwave irradiation. After consumption of starting material (monitor by TLC), reaction mixture was concentrated in vacuum to provide a crude residue. The crude residue was purified using column chromatography on silica gel using 30% CH<sub>2</sub>Cl<sub>2</sub> in hexane as eluents to afford N<sub>2</sub>,N<sub>3</sub>-bis(4-(trifluoromethyl)phenyl)quinoxaline-2,3-diamine (**MMV665794\_Target-12**) (30 mg, 7%) as a white solid.

### Synthesis of **MMV665794\_Set-2\_Target-1** (**MMV1634608-01**) and **Set-3\_Target-9** (**MMV1634609-01**)

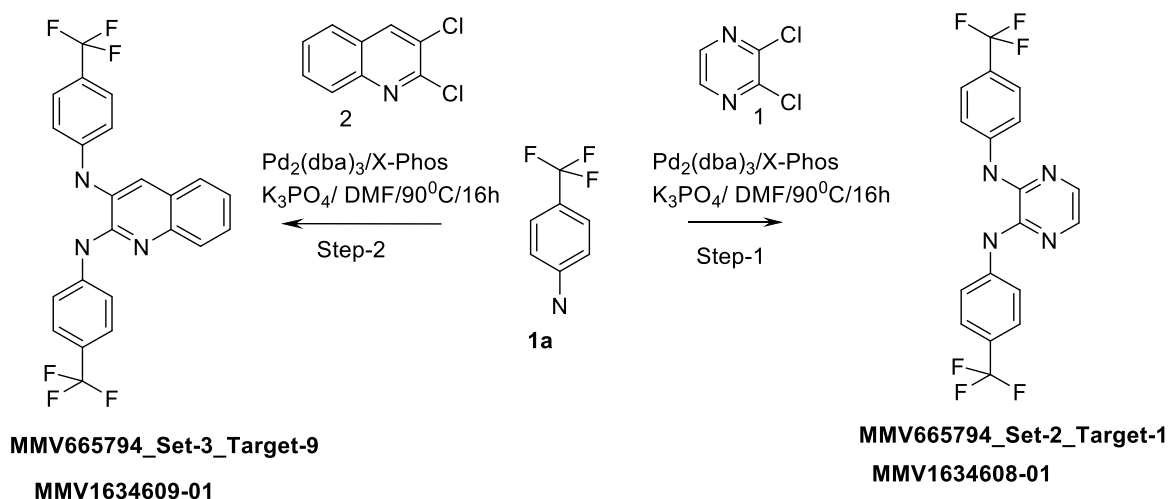

#### Step-1

#### Synthesis of compound **MMV665794\_Set-2\_Target-1** (**MMV1634608-01**)

To a stirred solution of 2,3-dichloropyrazine (**1**) (300 mg, 2.014 mmol) and 4-(trifluoromethyl)aniline (**1a**) (584 mg, 3.625 mmol) in DMF (6 ml) was added K<sub>3</sub>PO<sub>4</sub> (1.28 gm, 6.041 mmol) at RT. The reaction mixture was purged with argon for 20 min. Under argon atmosphere the reaction mixture was added Pd<sub>2</sub>(dba)<sub>3</sub> (370 mg, 0.403 mmol) and X-Phos (192 mg, 0.403 mmol). Then the reaction mixture was heated to 90°C for 16h. TLC (20% EtOAc-Hexane) showed completion of the reaction. It was quenched with water and extracted with EtOAc, washed with brine, dried over Na<sub>2</sub>SO<sub>4</sub> and concentrated under reduced pressure. The crude was purified by prep HPLC to afford N<sub>2</sub>,N<sub>3</sub>-bis[4-(trifluoromethyl)phenyl]pyrazine-2,3-diamine; (**MMV665794\_Set-2\_Target-1**) (30 mg, 5%) as pale-yellow solid.

## Step-2

### Synthesis of compound MMV665794\_Set-3\_Target-9 (MMV1634609-01)

To a stirred solution of 4-(trifluoromethyl)aniline (**1a**) (100 mg, 0.505 mmol) and 2,3-dichloroquinoline (**2**) (244 mg, 1.514 mmol) in DMF (2 ml) was added  $K_3PO_4$  (321.35 mg, 1.514 mmol) at RT under argon atmosphere. To this reaction mixture was added  $Pd_2(dba)_3$  (92 mg, 0.101 mmol) and X-Phos (48 mg, 0.101 mmol). Then the reaction mixture was heated to  $90^\circ C$  for 16h. TLC (20% EtOAc-Hexane) showed completion of the reaction. It was quenched with ice cold water and extracted with EtOAc, washed with brine, dried over  $Na_2SO_4$  and concentrated under reduced pressure. The crude was purified by prep HPLC to afford N2,N3-bis[4-(trifluoromethyl)phenyl]quinoline-2,3-diamine; **MMV665794\_Set-3\_Target-9** (25 mg, 11%) as white solid.

### Syntheses of MMV665794\_Set-2\_Target-3 (MMV1782345-01) and Set-3\_Target-12 (MMV1782343-01)

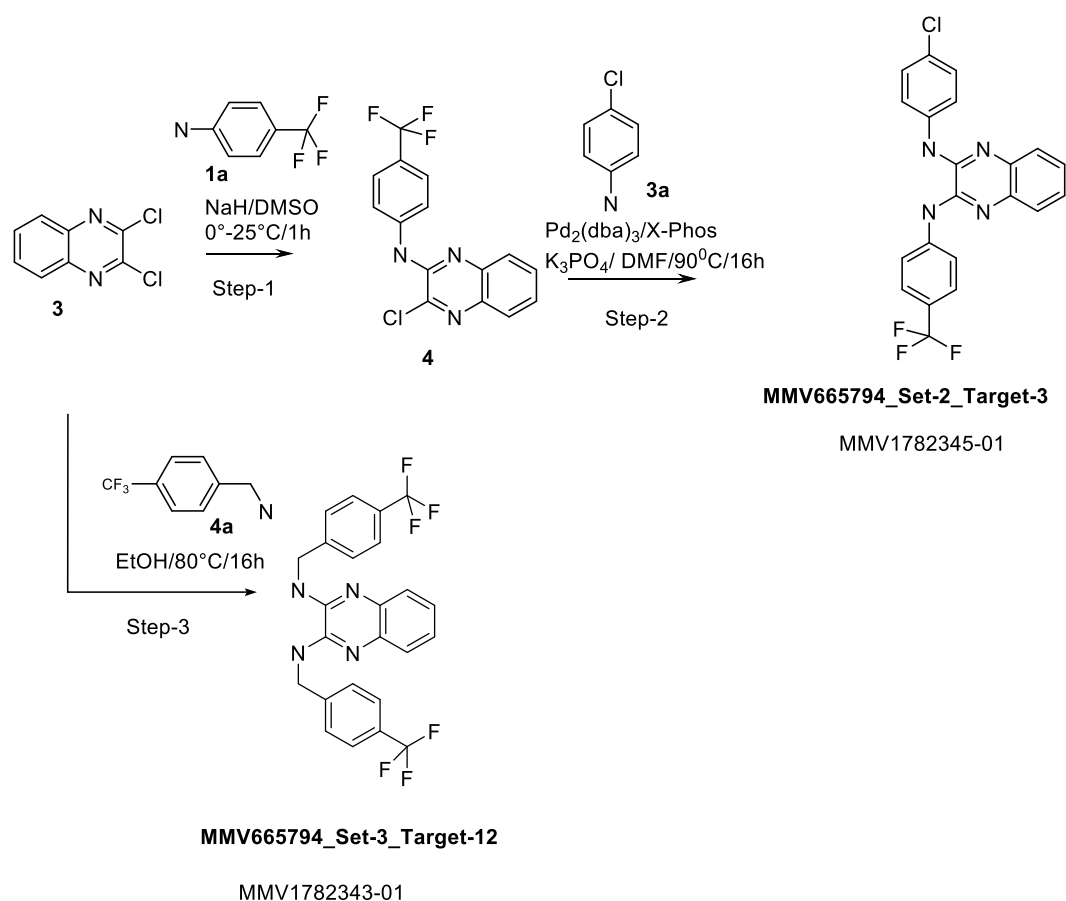

## Step-1

### Synthesis of compound 4

To a stirred solution of 4-(trifluoromethyl)aniline (**1a**) (485 mg, 3.015 mmol) in DMSO (10 ml) was added 60% NaH (300 mg, 7.538 mmol) at 0°C and was stirred for 10 min. Then 2,3-dichloroquinoxaline (**3**) (600 mg, 3.02 mmol) was added to this reaction mixture and allowed the reaction to stir for 1h at rt. TLC (20% EtOAc-Hexane) showed completion of the reaction. Added cold water to quench the reaction and extracted with EtOAc (25 ml x 2), washed with brine, dried over Na<sub>2</sub>SO<sub>4</sub> and concentrated under reduced pressure. The crude was purified by column chromatography (8% EtOAc- Hexane) to afford 3-chloro-N-(4-(trifluoromethyl)phenyl)quinoxalin-2-amine (**4**) (510 mg, 52%) as pale yellow solid.

## Step-2

### Synthesis of compound MMV665794\_Set-2\_Target-3 (MMV1782345-01)

To a stirred solution of 3-chloro-N-(4-(trifluoromethyl)phenyl)quinoxalin-2-amine (**4**) (200 mg, 0.618 mmol) and 4-chloroaniline (**3a**) (87 mg, 0.68 mmol) in DMF (5 ml) was added Potassium phosphate (393 mg, 1.854 mmol) at room temperature under argon atmosphere. Then Tris(dibenzylideneacetone)dipalladium (0.113 g, 0.124 mmol) and Dicyclohexyl[2',4',6'-tris(propan-2-yl)[1,1'-biphenyl]-2-yl]phosphane (0.059 mg, 0.124 mmol) was added to this reaction mixture. Then the reaction mixture was heated to 90°C for 16h. TLC (20% EtOAc-Hexane) showed completion of the reaction. It was quenched with water and extracted with EtOAc, washed with brine, dried over Na<sub>2</sub>SO<sub>4</sub> and concentrated under reduced pressure. The crude was purified by prep HPLC to afford N<sub>2</sub>-(4-chlorophenyl)-N<sub>3</sub>-(4-(trifluoromethyl)phenyl)quinoxaline-2,3-diamine (**MMV665794\_Set-2\_Target-3**) (40 mg, 16%) as pale yellow solid.

## Step-3

### Synthesis of compound MMV665794\_Set-3\_Target-12 (MMV1782343-01): Ref- CR302-12794-43-F

To a stirred solution of 2,3-dichloroquinoxaline (**3**) (0.600 g, 3.015 mmol) and (4-(trifluoromethyl)phenyl)methanamine (**4a**) (1.58 gm, 9.044 mmol) in ethanol (10 ml) was heated to 80°C in a sealed tube for 16h. After completion of reaction it was concentrated, diluted with 10% MeOH-DCM, washed with water, dried over Na<sub>2</sub>SO<sub>4</sub> and concentrated under reduced pressure to obtain crude. The crude was purified by column chromatography (10% EtOAc-Hexane) to afford N<sub>2</sub>,N<sub>3</sub>-bis(4-(trifluoromethyl)benzyl)quinoxaline-2,3-diamine (**MMV665794\_Set-3\_Target-12**) (22 mg, 2 %) as off white solid.

## 2. Supplementary Figures

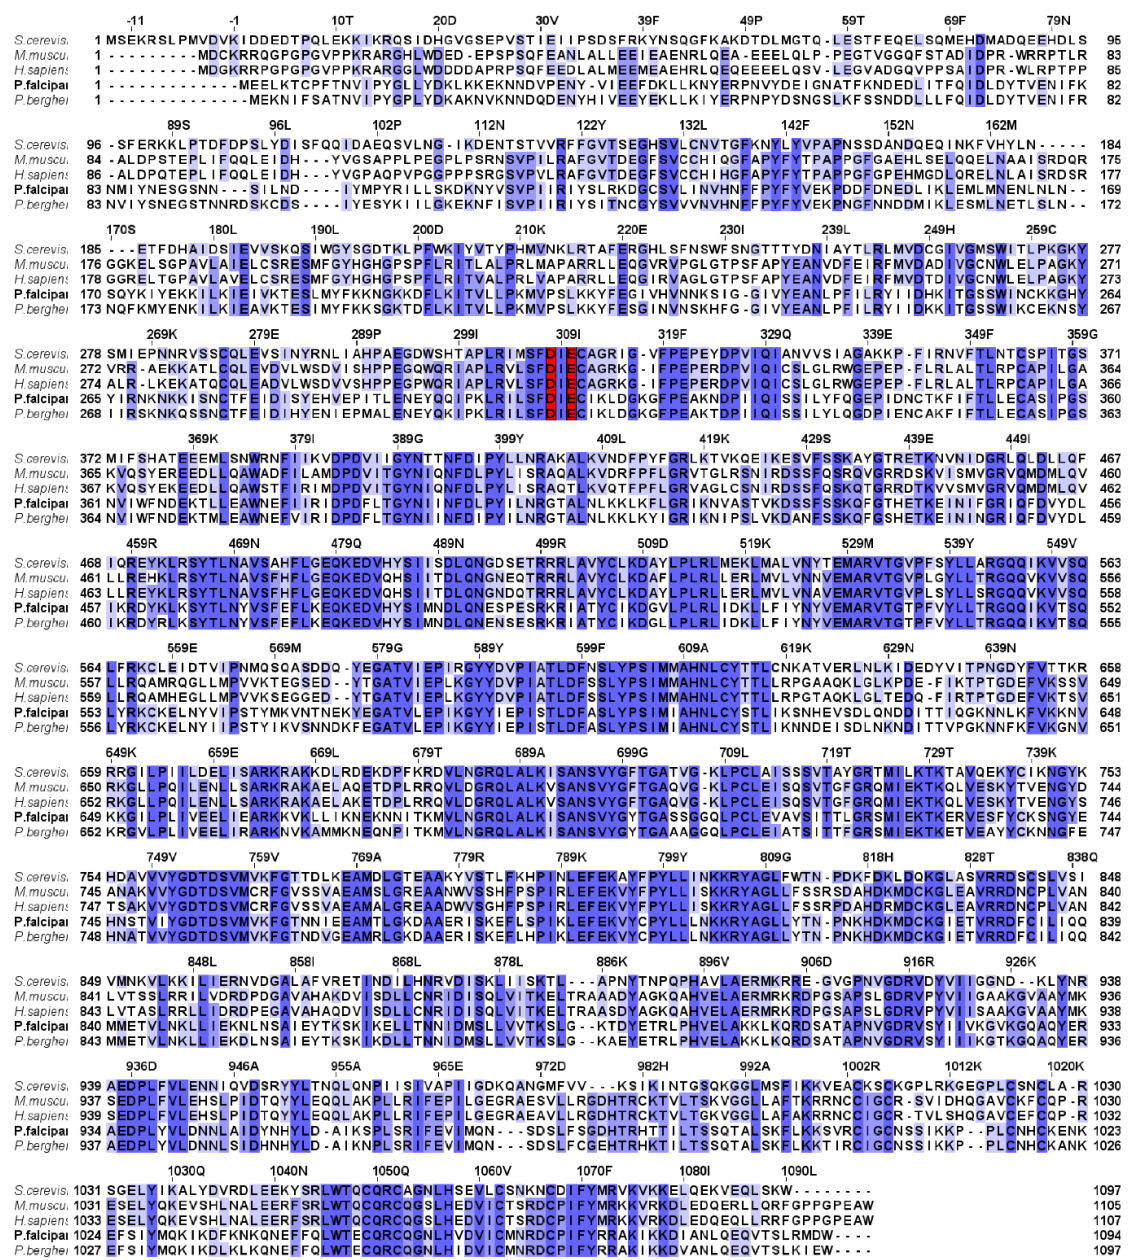

**Supplementary Figure 1. Alignment of DNA polymerase  $\delta$  from different species.** The DNA polymerase  $\delta$  catalytic subunit for yeast (*S. cerevisiae*), mouse (*M. musculus*), human (*H. sapiens*) and two malaria parasites (*P. falciparum* and *P. berghei*) were aligned using Clustal Omega. The two conserved catalytic residues of the 3'-5' exonuclease subunit mutated in the Dd2-Pol $\delta$  line (D308A / E310A) are highlighted in red.



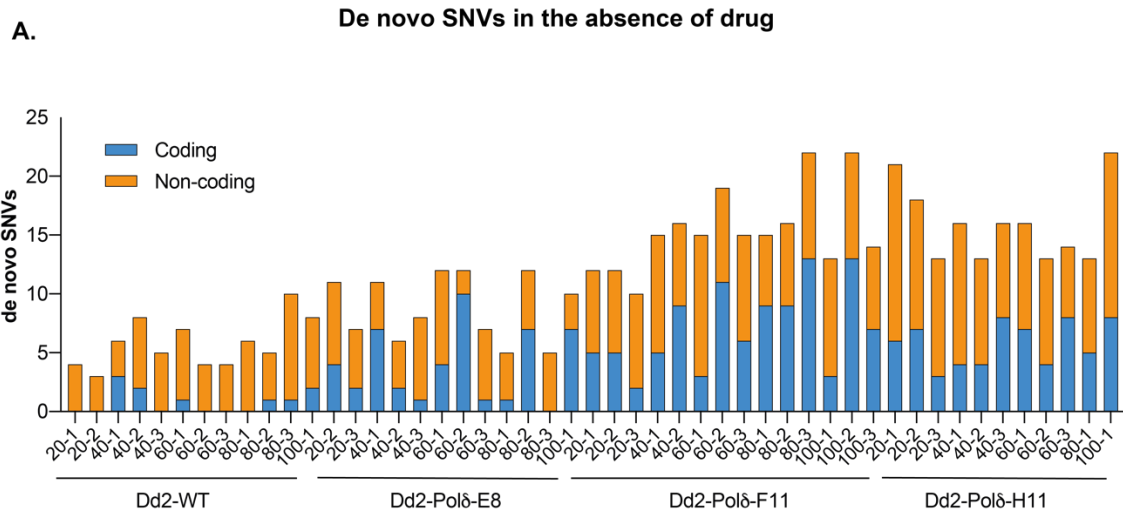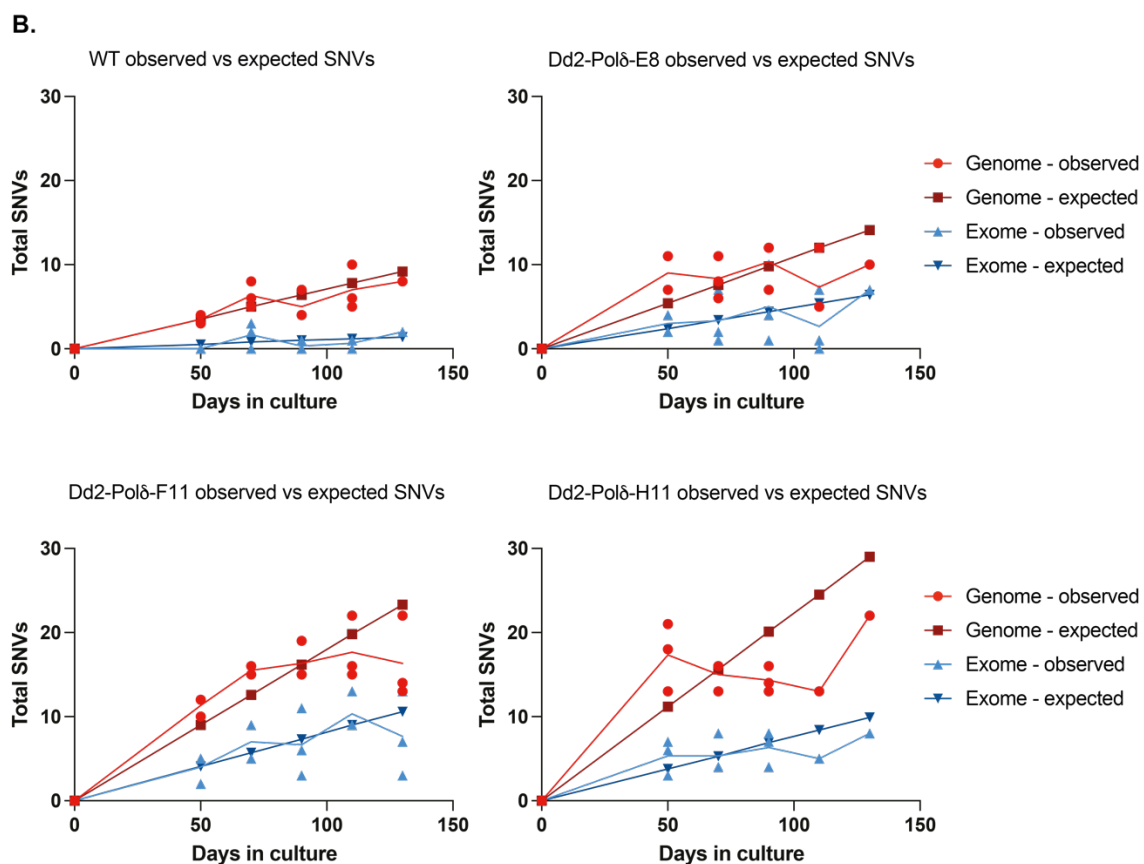

**Supplementary Figure 2. De novo SNVs observed in the absence of drug pressure.** **A)** SNVs observed during the mutation accumulation assay performed with Dd2-WT and three different clones of Dd2-Polδ. Parasite lines were grown in continuous culture for 100 days and sampled for whole-genome sequencing (relates to Figure 2). Labels refer to the collection day and clone number (e.g. 20-1: day 20 clone 1). **B)** SNVs observed over the assay period, plotted alongside the expected number of SNVs based on calculated mutation rate (Table 1). SNVs for Dd2-WT (n=12) and Dd2-Polδ clone E8 (n=12), F11 (n=14) and H11 (n=11) are shown. Source data are provided as a Source Data file.

**A.**

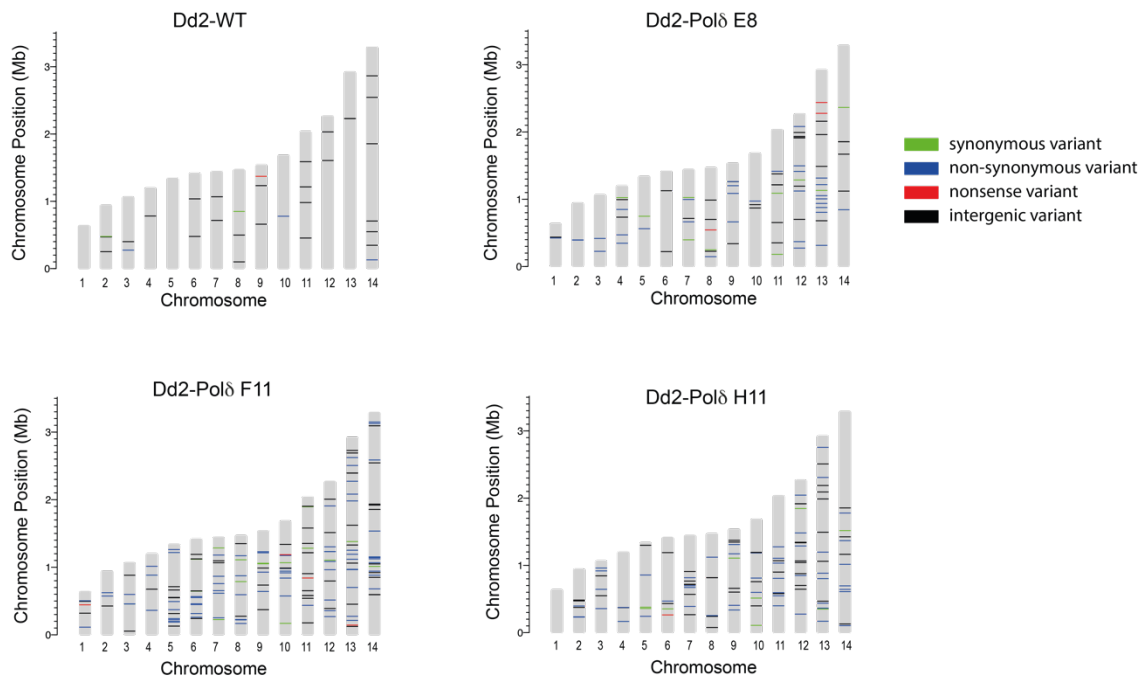

**B.**

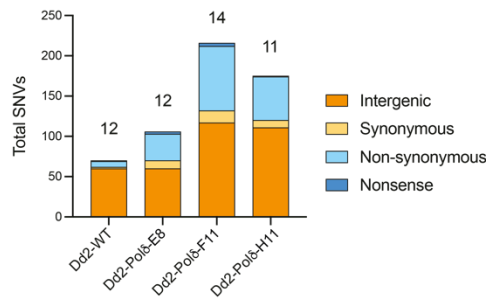

**C.**

**Genes with different non-synonymous mutations arising in multiple lines**

| Gene ID         | Gene Name                                              | Lines            | Mutations              |
|-----------------|--------------------------------------------------------|------------------|------------------------|
| PFDd2_020015000 | nucleoporin NUP390, putative                           | PolδE8, PolδH11  | E2752D, F1942L, E2030K |
| PFDd2_100034900 | conserved Plasmodium protein, unknown function         | PolδF11, PolδH11 | E318*, S678L           |
| PFDd2_120011400 | DNA-directed RNA polymerase III subunit RPC2, putative | PolδE8, PolδH11  | D643Y, G348C           |
| PFDd2_130027000 | protein kinase domain-containing protein, putative     | PolδE8, PolδH11  | Q2607K, F459L          |

**Supplementary Figure 3. Genomic position of *de novo* SNVs.** **A)** SNVs observed in the mutation accumulation experiment (Figure 2) are displayed for Dd2-WT and the three Dd2-Polδ clones. Dashed lines indicate their position on each chromosome, and colors indicate the mutation type. **B)** Total number and type of SNVs observed across all sequence clones (number of independent clones shown above each bar). **C)** List of genes with multiple different non-synonymous mutations observed during the mutation accumulation (no drug) experiment. Source data are provided as a Source Data file.

**A.**

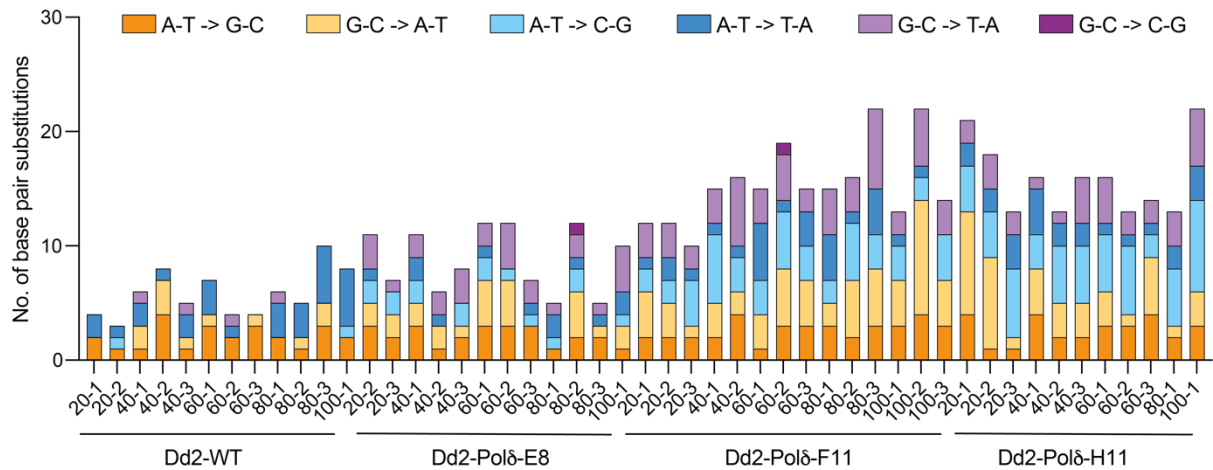

**B.**

| Parasite line | Base pair substitutions |             |           |               |           |           |           |
|---------------|-------------------------|-------------|-----------|---------------|-----------|-----------|-----------|
|               | Ts:Tv                   | Transitions |           | Transversions |           |           |           |
|               |                         | A:T > G:C   | G:C > A:T | A:T > T:A     | G:C > T:A | A:T > C:G | G:C > C:G |
| Dd2-WT        | 1.04                    | 2           | 0.9       | 2.3           | 0.3       | 0.2       | 0         |
| Dd2-Polδ-E8   | 0.90                    | 2.2         | 2         | 1             | 2.3       | 1.3       | 0.08      |
| Dd2-Polδ-F11  | 0.72                    | 2.6         | 3.9       | 1.9           | 3.6       | 3.4       | 0.07      |
| Dd2-Polδ-H11  | 0.66                    | 2.6         | 3.7       | 2.1           | 2.6       | 4.8       | 0         |

Base-pair substitutions in Dd2-WT and Dd2-Polδ lines in drug-free media over 100 days. The number of base-pair substitutions are averaged for clones collected during day 20-100.

**Supplementary Figure 4. Transition:transversion (Ts:Tv) ratio of base pair substitutions.** The base pair substitutions for transition (A:T → G:C and G:C → A:T) and transversion (A:T → T:A, G:C → T:A, A:T → C:G, and G:C → C:G) were examined in the Dd2-WT and Dd2-Polδ clones. **A)** Base pair substitutions in Dd2-WT and three Dd2-Polδ lines in drug-free media over 100 days. Labels refer to the collection day and clone number (e.g. 20-1: day 20 clone 1). **B)** The number of base-pair substitutions were averaged for clones of each line collected during the 100-day assay. The Ts:Tv ratio for Dd2-WT was 1.04, whereas the Ts:Tv ratio for the Dd2-Polδ clones ranged from 0.66 - 0.90. This moderately decreased Ts:Tv in Dd2-Polδ indicated that base pair substitutions tend towards transversions. This was evident especially for base-pair changes from G:C → T:A and A:T → C:G that showed an increased frequency of 7-12 fold and 5-24 fold, respectively. In addition, the transitions from G:C → A:T in Dd2-Polδ increased about 2-4 fold. Source data are provided as a Source Data file.

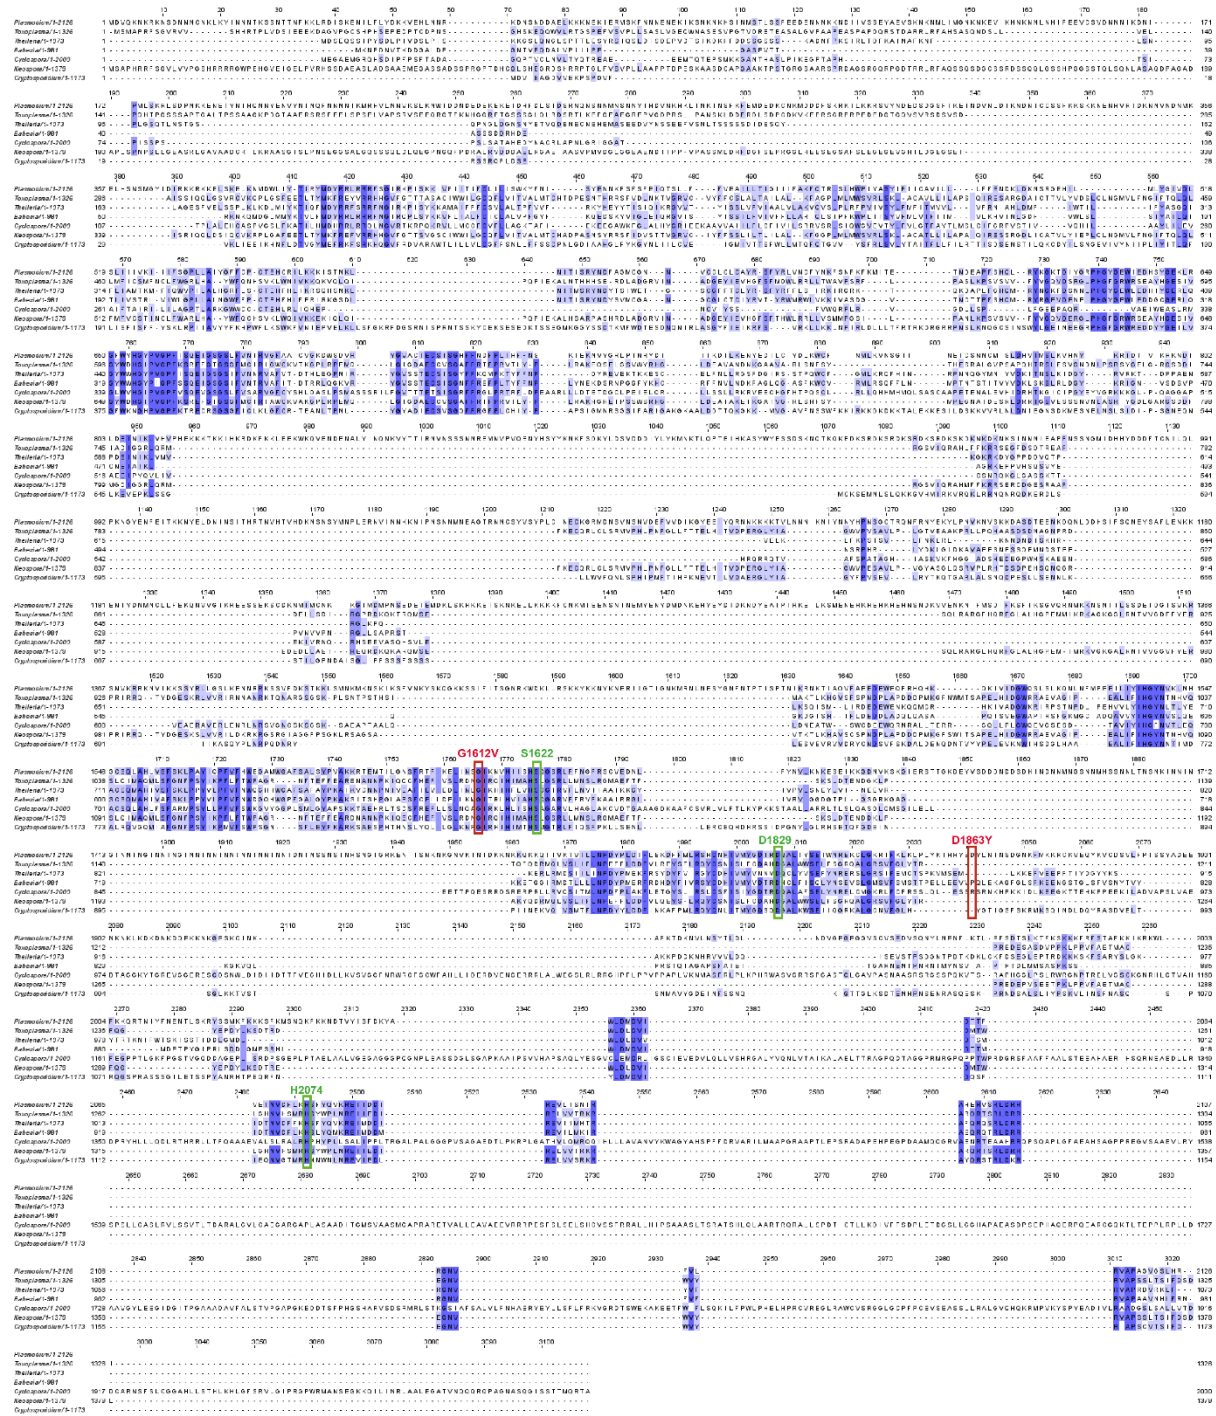

**Supplementary Figure 5. Alignment of QPR1 in different apicomplexan species.** Putative homologs of PfQRP1 (PF3D7\_135990) were identified using BLAST and aligned with Clustal Omega. Shown are *Toxoplasma gondii* (TGME49\_289880), *Theileria parva* (TpMuguga\_02g02080), *Babesia bovis* (BBOV\_I004840), *Neospora caninum* (NCLIV\_042110), *Cyclospora cayetanensis* (cyc\_01400) and *Cryptosporidium parvum* (cgd3\_590). Mutations involved in quinoxaline resistance are shown in red (G1612V & D1863Y), and a putative catalytic triad (Ser-His-Asp) is highlighted in green.

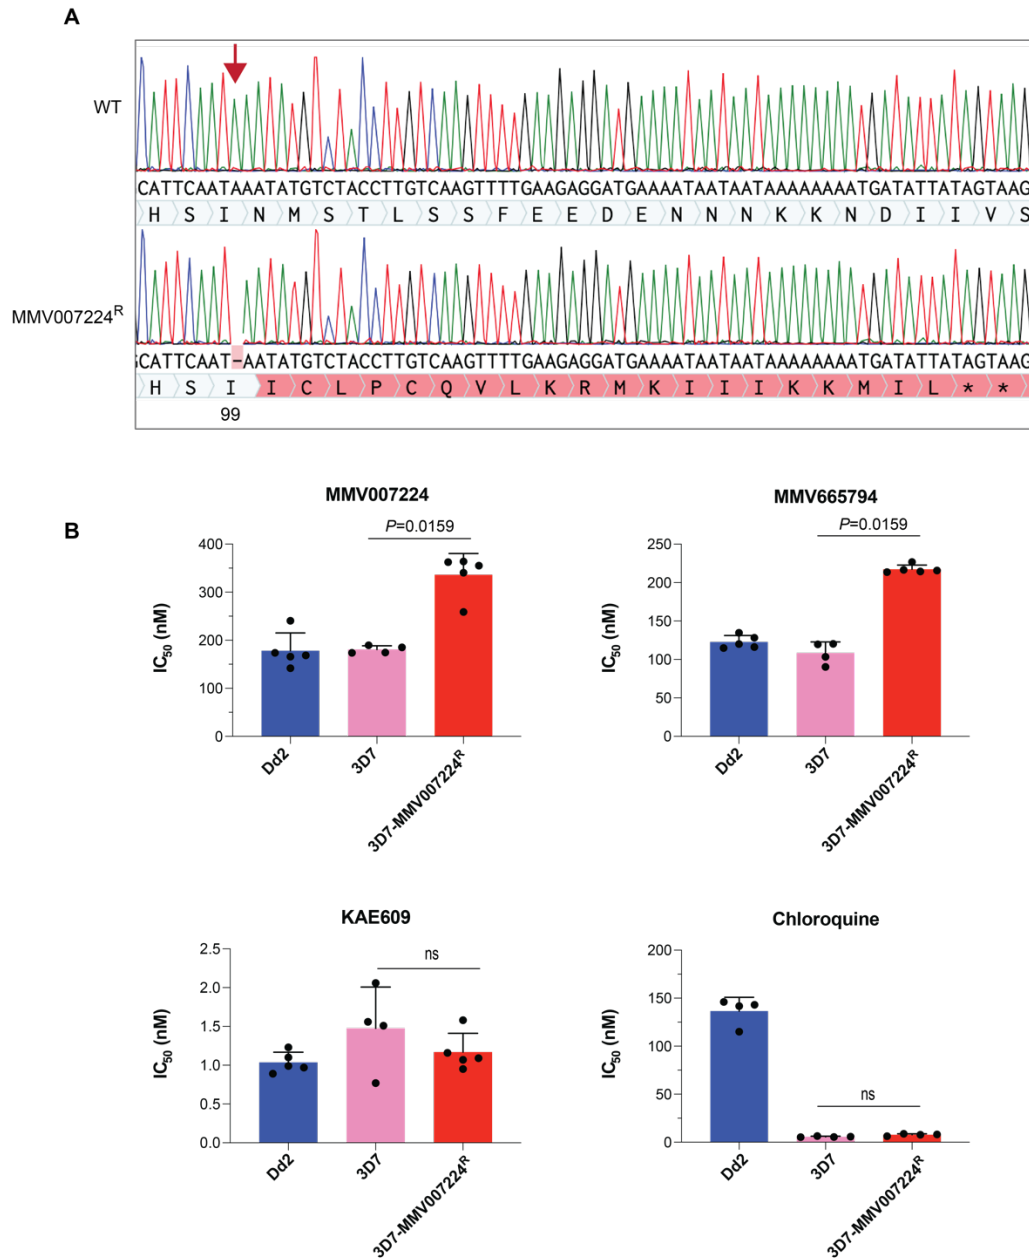

**Supplementary Figure 6. MMV007224-selected parasite acquiring a frameshift in QRP1 confers low-grade resistance to its quinoxaline analogue (MMV665794).** **A**) Sanger sequencing of the parasite line 3D7-MMV007224<sup>R</sup>. The 1 bp deletion at codon Ile99 (red arrow) causes a frameshift resulting in a premature stop codon at amino acid 120 out of 2126. **B**) Drug assays showed that the MMV007224-selected line (3D7 background) shows low-level resistance to both MMV007224 and its analogue MMV665794, but not the control compounds KAE609 and chloroquine. Each dot represents a biological replicate, with mean±SD shown, and statistical significance relative to the wild type 3D7 line determined by two-sided Mann-Whitney *U* test. The following independent biological replicates were performed: MMV007224: Dd2 (5), 3D7 (4), 3D7-MMV077224R (5); MMV665794: Dd2 (5), 3D7 (4), 3D7-MMV077224R (5); KAE609: Dd2 (5), 3D7 (4), 3D7-MMV077224R (5); Chloroquine: Dd2 (4), 3D7 (4), 3D7-MMV077224R (4). Source data are provided as a Source Data file.

**A**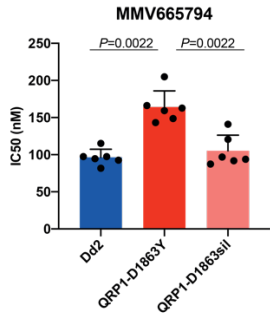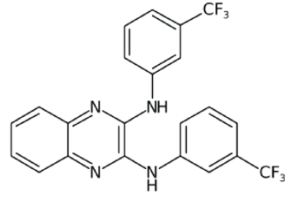**B**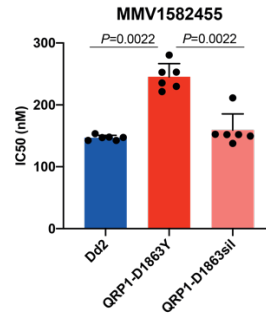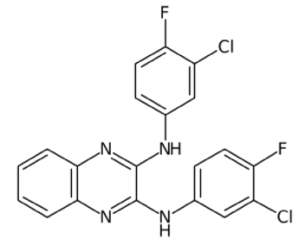**C**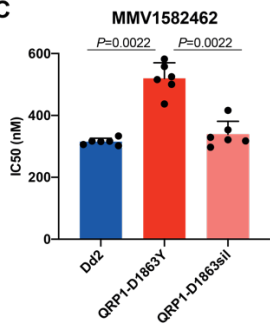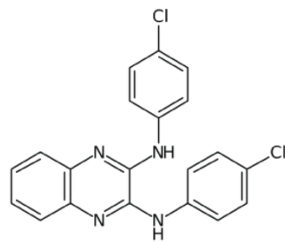**D**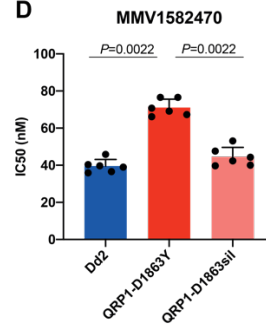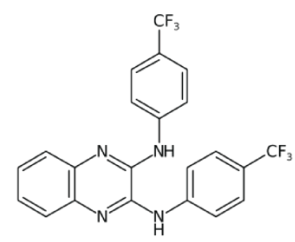**E**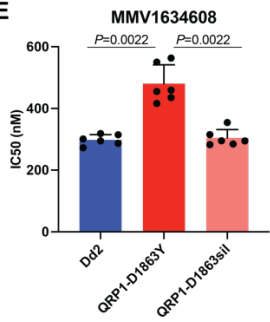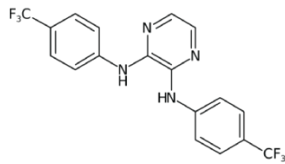**F**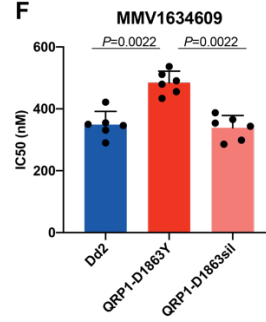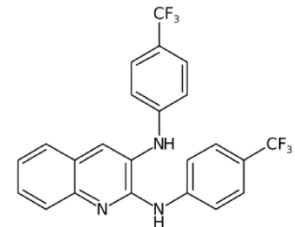**G**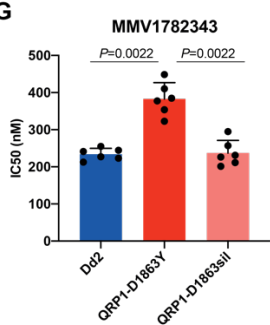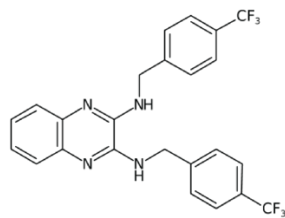**H**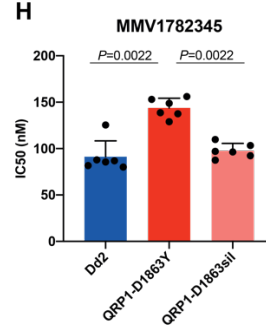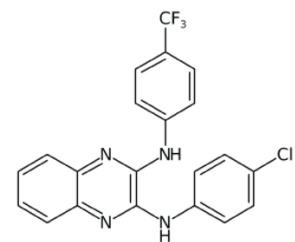

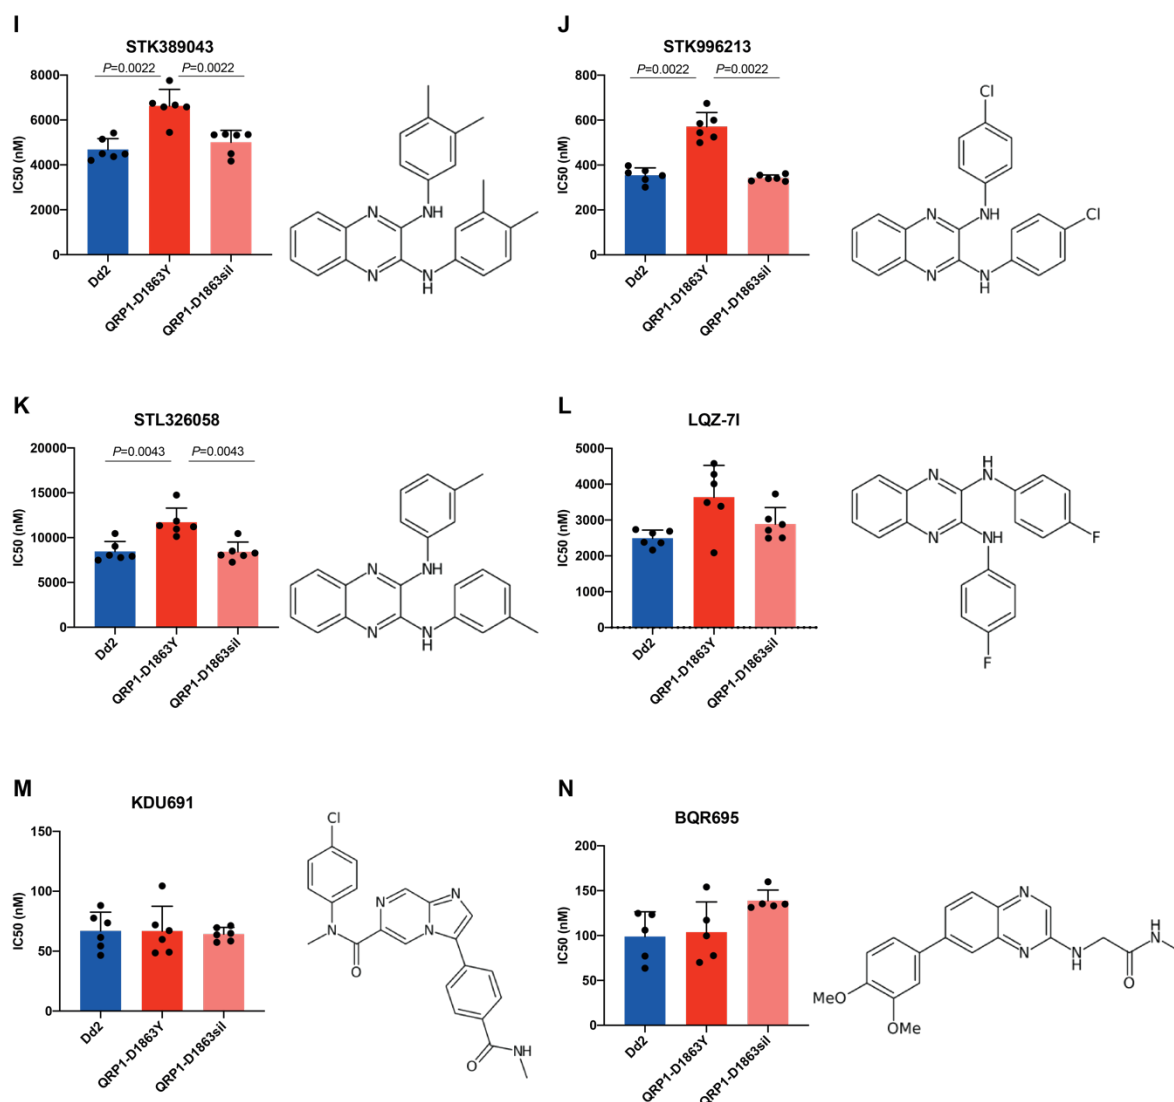

| Panel | Compound   | SMILES                                                          | Chemical name                                                                                 |
|-------|------------|-----------------------------------------------------------------|-----------------------------------------------------------------------------------------------|
| A     | MMV665794  | FC(c1cc(Nc2c(Nc3cc(C(F)(F)F)ccc3)nc(c4n2)cccc4)ccc1)F)F         | N2,N3-bis(3-(trifluoromethyl)phenyl)quinoxaline-2,3-diamine                                   |
| B     | MMV1582455 | N(c1ccc(F)c(Cl)c1)c2c(Nc3ccc(F)c(Cl)c3)nc4c(ccc4)n2             | N,N'-bis(3-chloro-4-fluorophenyl)quinoxaline-2,3-diamine                                      |
| C     | MMV1582462 | c1(c(ccc2)nc(Nc3ccc(Cl)cc3)c(Nc4ccc(Cl)cc4)n1)c2                | N,N'-bis(4-chlorophenyl)quinoxaline-2,3-diamine                                               |
| D     | MMV1582470 | FC(F)(F)c(cc1)ccc1Nc(nc2c(n3)cccc2)c3Nc(c4)ccc(C(F)(F)F)cc4     | N2,N3-bis(4-(trifluoromethyl)phenyl)quinoxaline-2,3-diamine                                   |
| E     | MMV1634608 | c1nc(Nc2ccc(C(F)(F)F)cc2)c(Nc3ccc(C(F)(F)F)cc3)nc1              | N2,N3-bis(4-(trifluoromethyl)phenyl)pyrazine-2,3-diamine                                      |
| F     | MMV1634609 | c(cc(c1Nc2ccc(C(F)(F)F)cc2)Nc3ccc(C(F)(F)F)cc3)(cccc4)c4n1      | N2,N3-bis(4-(trifluoromethyl)phenyl)quinoxaline-2,3-diamine                                   |
| G     | MMV1782343 | c(ccc1CNc(c(NCc2ccc(C(F)(F)F)cc2)nc3c4cccc3)n4)C(F)(F)F)c1      | N2,N3-bis(4-(trifluoromethyl)benzyl)quinoxaline-2,3-diamine                                   |
| H     | MMV1782345 | c(nc1Nc2ccc(Cl)cc2)(ccc3)c3nc1Nc4ccc(C(F)(F)F)cc4               | N2-(4-chlorophenyl)-N3-(4-(trifluoromethyl)phenyl)quinoxaline-2,3-diamine                     |
| I     | STK389043  | Cc1ccc(Nc2nc3cccc3nc2Nc2ccc(Cl)c(Cl)c2)cc1C                     | N2,N3-bis(3,4-dimethylphenyl)quinoxaline-2,3-diamine                                          |
| J     | STK996213  | Clc1ccc(Nc2nc3cccc3nc2Nc2ccc(Cl)cc2)cc1                         | N2,N3-bis(4-chlorophenyl)quinoxaline-2,3-diamine                                              |
| K     | STL326058  | Cc1ccc(Nc2nc3cccc3nc2Nc2ccc(Cl)c2)cc1                           | N2,N3-di-m-tolylquinoxaline-2,3-diamine                                                       |
| L     | LQZ-71     | C1=CC=C2C(=C1)N=C(C(=N2)NC3=CC=C(C(=C3)F)NC4=CC=C(C(=C4)F       | N2,N3-bis(4-fluorophenyl)quinoxaline-2,3-diamine                                              |
| M     | KDU691     | CNC(=O)C1=CC=C(C=C1)C2=CN=C3N2C=C(N=C3)C(=O)N(C)C4=CC=C(C=C4)Cl | N-(4-chlorophenyl)-N-methyl-3-(4-(methylcarbamoyl)phenyl)imidazo[1,2-a]pyrazine-6-carboxamide |
| N     | BQR-695    | CNC(=O)CNC1=CN=C2C=CC(=CC2=N1)C3=CC=C(C(=C3)OC)OC               | 2-((7-(3,4-dimethoxyphenyl)quinoxalin-2-yl)amino)-N-methylacetamide                           |

**Supplementary Figure 7. Drug susceptibility of CRISPR-edited QRP1 lines against quinoxaline analogues.** IC<sub>50</sub> values of CRISPR-edited QRP1 lines encoding the D1863Y mutant or silent control, alongside the parental wild type Dd2, were tested against a panel of quinoxaline-like analogs synthesised (panels A-H) or sourced commercially (I-L), as well as two compounds (M-N) with an unrelated scaffold and mode-of-action. Each dot represents a biological replicate, with mean±SD shown, and statistical significance relative to wild type Dd2 or the silent-edited control line determined by two-sided Mann-Whitney *U* test. n=5 (BQR695) and n=6 (all other compounds) independent biological replicates were performed. Source data are provided as a Source Data file.

### De novo SNVs under drug pressure

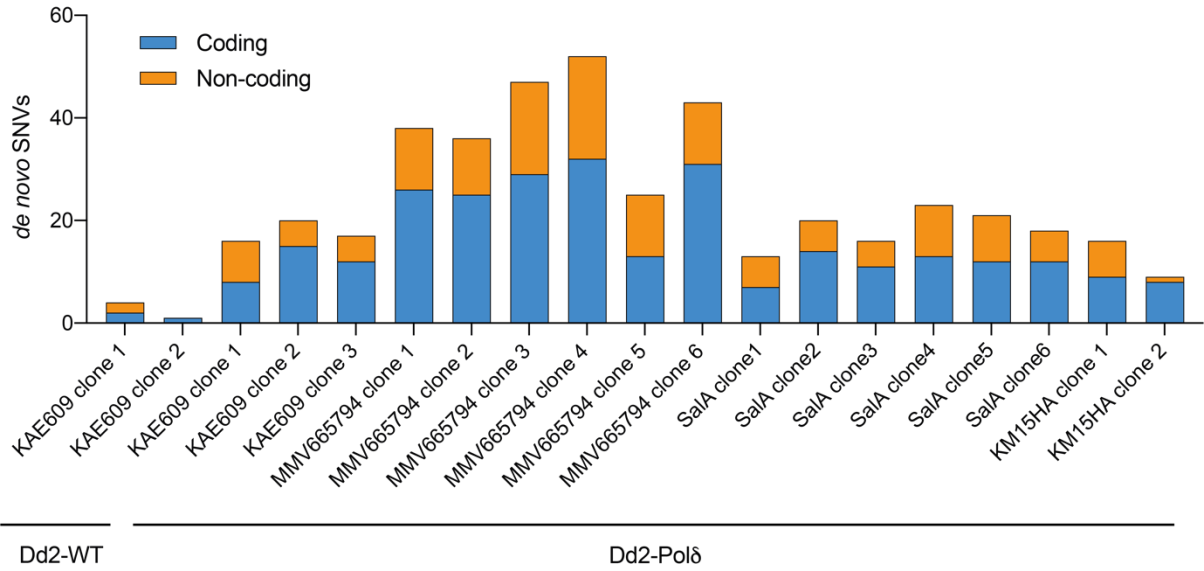

**Supplementary Figure 8. De novo SNVs observed in the presence of drug pressure.** SNVs observed in clonal drug-evolved parasites (WT or Dd2-Pol $\delta$  clone H11). Relates to Figure 6 and Supplementary Data 3. Source data are provided as a Source Data file.



**A.**

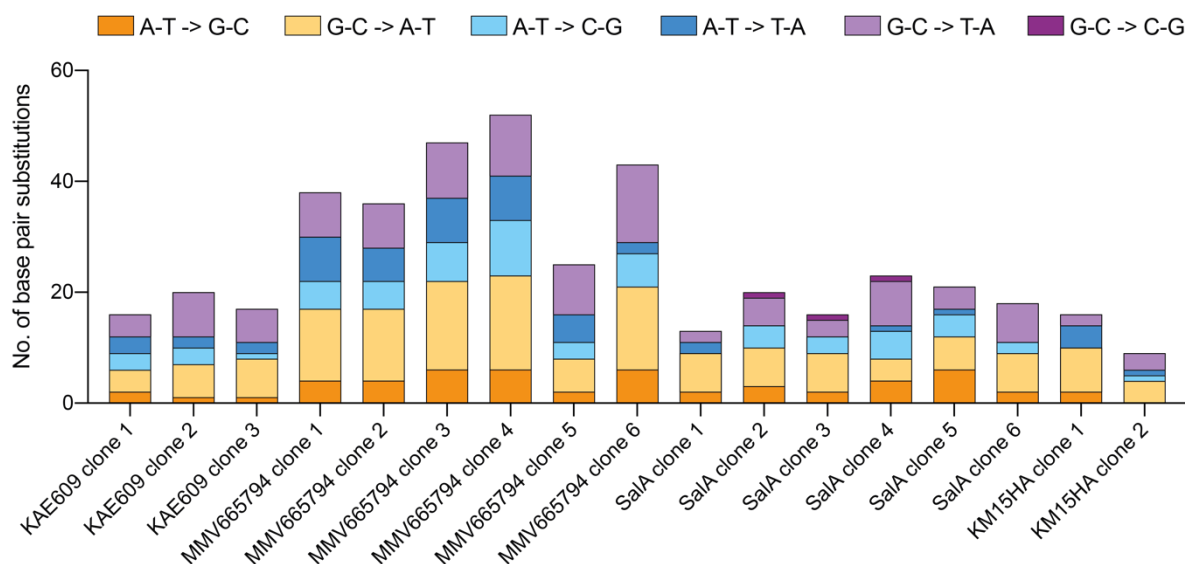

**B.**

| Compound              | Ts:Tv | Base pair substitutions |           |               |           |           |           |
|-----------------------|-------|-------------------------|-----------|---------------|-----------|-----------|-----------|
|                       |       | Transitions             |           | Transversions |           |           |           |
|                       |       | A:T > G:C               | G:C > A:T | A:T > T:A     | G:C > T:A | A:T > C:G | G:C > C:G |
| KAE609                | 0.68  | 1.3                     | 5.7       | 2.3           | 6.0       | 2.3       | 0         |
| MMV665794             | 0.81  | 4.7                     | 13.3      | 6.2           | 10.0      | 6.0       | 0         |
| Salinopostin A        | 1.05  | 3.2                     | 6.3       | 0.7           | 4.8       | 3.0       | 0.5       |
| KM15HA                | 1.30  | 1.0                     | 6.0       | 2.5           | 2.5       | 0.5       | 0         |
| Dd2-Pol $\delta$ -H11 | 0.66  | 2.6                     | 3.7       | 2.1           | 2.6       | 4.8       | 0         |

Base-pair substitutions in Dd2-Pol $\delta$  under drug pressure. The number of base-pair substitutions are averaged for clones.

**Supplementary Figure 9. Transition:transversion (Ts:Tv) ratios of base pair substitutions in cultures**

**exposed to drug-pressure.** **A)** Base pair substitutions in the Dd2-Pol $\delta$  clone H11 after *in vitro* evolution of resistance to KAE609, MMV665794, Salinopostin A, and KM15HA. **B)** The number of base-pair substitutions were averaged for clones of each selection. Source data are provided as a Source Data file.

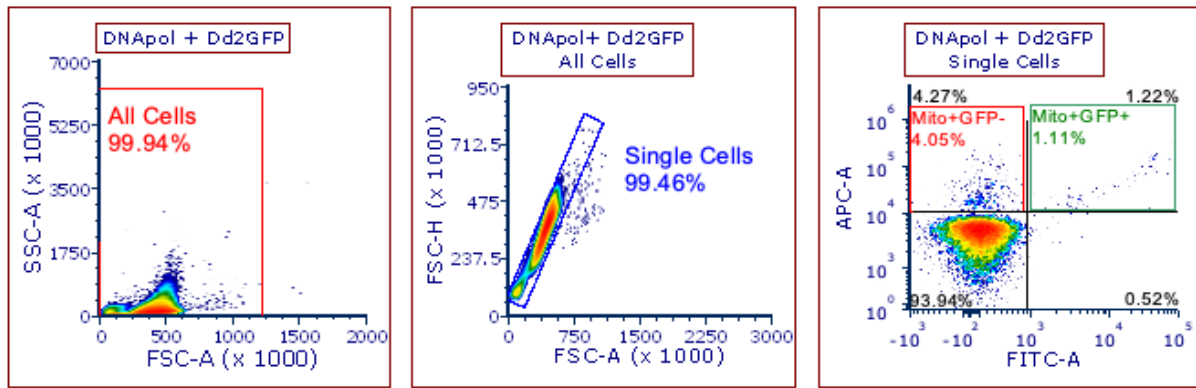

**Supplementary Figure 10. Flow cytometry gating strategy.** Relates to Fig. 1c. Parasites were stained with MitoTracker Deep Red FM as detailed in the Methods, and analyzed on a CytoFlex S flow cytometer. Events were gated using forward scatter area (FSC-A) vs side scatter area (SSC-A), and the population of single cells gated using forward scatter area vs height (FSC-H). Total parasite population, detected by MitoTracker Deep Red FM staining, was distinguished from uninfected RBCs (lower left) in the APC channel, with GFP-positive parasites detected in the FITC channel.

### 3. Supplementary Tables

**Supplementary Table 1. The coordinates of the Dd2 core genome, translated from 3D7 core genome coordinates.**

| Chromosome | Start coordinate | Stop coordinate |
|------------|------------------|-----------------|
| PfDd2_01   | 49837            | 414782          |
| PfDd2_01   | 417189           | 533792          |
| PfDd2_02   | 947              | 340952          |
| PfDd2_02   | 344102           | 755243          |
| PfDd2_03   | 50904            | 577484          |
| PfDd2_03   | 579844           | 981145          |
| PfDd2_04   | 51063            | 505798          |
| PfDd2_04   | 563790           | 590934          |
| PfDd2_04   | 593460           | 883860          |
| PfDd2_04   | 920060           | 1080606         |
| PfDd2_05   | 41431            | 460387          |
| PfDd2_05   | 462029           | 1326561         |
| PfDd2_06   | 47112            | 454148          |
| PfDd2_06   | 456464           | 698184          |
| PfDd2_06   | 710482           | 1263370         |
| PfDd2_07   | 53632            | 483475          |
| PfDd2_07   | 566150           | 769157          |
| PfDd2_07   | 771626           | 1339473         |
| PfDd2_08   | 70570            | 295699          |
| PfDd2_08   | 298062           | 424187          |
| PfDd2_08   | 468417           | 1365003         |
| PfDd2_09   | 73262            | 1234907         |
| PfDd2_09   | 1237230          | 1464236         |
| PfDd2_10   | 45574            | 1550128         |
| PfDd2_11   | 20563            | 740907          |
| PfDd2_11   | 743186           | 1915931         |
| PfDd2_12   | 37277            | 742849          |
| PfDd2_12   | 756229           | 1266945         |
| PfDd2_12   | 1269177          | 1671085         |
| PfDd2_12   | 1747106          | 2165416         |
| PfDd2_13   | 79097            | 1180050         |
| PfDd2_13   | 1182374          | 2807423         |
| PfDd2_14   | 17466            | 1051096         |
| PfDd2_14   | 1054725          | 3234766         |

**Supplementary Table 2. The number of *de novo* SNVs in Dd2-WT and Dd2-Pol $\delta$  occurring during mutation accumulation assay.**

Parasite naming system in this table is indicated as “strain - days in culture - clone#”

Day 0 of each line was used as a baseline for counting *de novo* SNVs.

| Parasite            | Coding region | Non-coding region | Core genome |
|---------------------|---------------|-------------------|-------------|
| <b>Dd2-1-1</b>      | <b>0</b>      | <b>0</b>          | <b>0</b>    |
| Dd2-20-1            | 0             | 4                 | 4           |
| Dd2-20-2            | 0             | 3                 | 3           |
| Dd2-40-1            | 3             | 3                 | 6           |
| Dd2-40-2            | 2             | 6                 | 8           |
| Dd2-40-3            | 0             | 5                 | 5           |
| Dd2-60-1            | 1             | 6                 | 7           |
| Dd2-60-2            | 0             | 4                 | 4           |
| Dd2-60-3            | 0             | 4                 | 4           |
| Dd2-80-1            | 0             | 6                 | 6           |
| Dd2-80-2            | 1             | 4                 | 5           |
| Dd2-80-3            | 1             | 9                 | 10          |
| Dd2-100-1           | 2             | 6                 | 8           |
| <b>poldmE8-1-1</b>  | <b>0</b>      | <b>0</b>          | <b>0</b>    |
| poldmE8-20-2        | 4             | 7                 | 11          |
| poldmE8-20-3        | 2             | 5                 | 7           |
| poldmE8-40-1        | 7             | 4                 | 11          |
| poldmE8-40-2        | 2             | 4                 | 6           |
| poldmE8-40-3        | 1             | 7                 | 8           |
| poldmE8-60-1        | 4             | 8                 | 12          |
| poldmE8-60-2        | 10            | 2                 | 12          |
| poldmE8-60-3        | 1             | 6                 | 7           |
| poldmE8-80-2        | 7             | 5                 | 12          |
| poldmE8-80-3        | 0             | 5                 | 5           |
| poldmE8-100-1       | 7             | 3                 | 10          |
| <b>poldmF11-1-1</b> | <b>0</b>      | <b>0</b>          | <b>0</b>    |
| poldmF11-20-1       | 5             | 7                 | 12          |
| poldmF11-20-2       | 5             | 7                 | 12          |
| poldmF11-20-3       | 2             | 8                 | 10          |
| poldmF11-40-1       | 5             | 10                | 15          |
| poldmF11-40-2       | 9             | 7                 | 16          |
| poldmF11-60-1       | 3             | 12                | 15          |
| poldmF11-60-2       | 11            | 8                 | 19          |
| poldmF11-60-3       | 6             | 9                 | 15          |
| poldmF11-80-1       | 9             | 6                 | 15          |
| poldmF11-80-2       | 9             | 7                 | 16          |
| poldmF11-80-3       | 13            | 9                 | 22          |
| poldmF11-100-1      | 3             | 10                | 13          |
| poldmF11-100-2      | 13            | 9                 | 22          |
| poldmF11-100-3      | 7             | 7                 | 14          |
| <b>poldmH11-1-1</b> | <b>0</b>      | <b>0</b>          | <b>0</b>    |
| poldmH11-20-1       | 6             | 15                | 21          |
| poldmH11-20-2       | 7             | 11                | 18          |
| poldmH11-20-3       | 3             | 10                | 13          |
| poldmH11-40-1       | 4             | 12                | 16          |
| poldmH11-40-2       | 4             | 9                 | 13          |
| poldmH11-40-3       | 8             | 8                 | 16          |
| poldmH11-60-1       | 7             | 9                 | 16          |
| poldmH11-60-2       | 4             | 9                 | 13          |
| poldmH11-60-3       | 8             | 6                 | 14          |
| poldmH11-80-1       | 5             | 8                 | 13          |
| poldmH11-100-1      | 8             | 14                | 22          |

**Supplementary Table 3: Identical and nearby mutations arising in different lines.**

| Gene ID         | Gene Name                                                   | Mutation Type           | Position | Nucleotide | Lines Containing Mutations                | Additional Nearby (<50bp) Mutations | Distance to Nearby Mutation (bp) |
|-----------------|-------------------------------------------------------------|-------------------------|----------|------------|-------------------------------------------|-------------------------------------|----------------------------------|
| PfDd2_020016900 | conserved Plasmodium protein, unknown function              | Intergenic (upstream)   | 471545   | c.-4875C>T | Dd2, Dd2Polδ-H11                          | YES                                 | 2                                |
| PfDd2_060034400 | SET domain protein, putative                                | Intergenic (upstream)   | 1189896  | c.-643T>C  | Dd2Polδ-F11, Dd2Polδ-H11                  | NO                                  |                                  |
| PfDd2_070021100 | calcium-dependent protein kinase 4                          | Intergenic (upstream)   | 715218   | c.-686T>A  | Dd2, Dd2Polδ-E8, Dd2Polδ-H11              | NO                                  |                                  |
| PfDd2_070029500 | DNA mismatch repair protein PMS1, putative                  | Intergenic (downstream) | 1067187  | c.*192A>T  | Dd2, Dd2Polδ-F11                          | NO                                  |                                  |
| PfDd2_090020800 | cytochrome c oxidase subunit ApiCOX30, putative             | Intergenic (upstream)   | 659167   | c.-2354T>A | Dd2, Dd2Polδ-H11                          | NO                                  |                                  |
| PfDd2_110020500 | tyrosine--tRNA ligase                                       | Intergenic (upstream)   | 580315   | c.-2929G>A | Dd2Polδ-F11, Dd2Polδ-H11                  | YES (2)                             | 3, 8                             |
| PfDd2_110036900 | conserved Plasmodium protein, unknown function              | Intergenic (upstream)   | 1214701  | c.-40T>A   | Dd2, Dd2Polδ-E8, Dd2Polδ-H11              | YES                                 | 3                                |
|                 |                                                             |                         | 1214704  | c.-43T>C   | Dd2, Dd2Polδ-E8, Dd2Polδ-F11, Dd2Polδ-H11 |                                     |                                  |
| PfDd2_120023100 | triose or hexose phosphate/phosphate translocator, putative | Intergenic (upstream)   | 701420   | c.-1747A>G | Dd2Polδ-E8, Dd2Polδ-H11                   | NO                                  |                                  |
| PfDd2_120051300 | delta-aminolevulinic acid synthetase                        | Intergenic (upstream)   | 1916041  | c.-1763A>T | Dd2Polδ-E8, Dd2Polδ-H11                   | YES                                 | 14                               |
| PfDd2_130031000 | phosphoribosylpyrophosphate synthetase                      | Intergenic (upstream)   | 1060382  | c.-2587T>A | Dd2Polδ-F11, Dd2Polδ-H11                  | NO                                  |                                  |
| PfDd2_140050000 | RNA-binding protein, putative                               | Intergenic (downstream) | 1854987  | c.*966A>C  | Dd2Polδ-E8, Dd2Polδ-F11                   | YES                                 | 7                                |
|                 |                                                             |                         | 1854994  | c.*973T>C  | Dd2, Dd2Polδ-E8, Dd2Polδ-F11, Dd2Polδ-H11 |                                     |                                  |
| PfDd2_140067300 | conserved Plasmodium protein, unknown function              | Intergenic (upstream)   | 2544236  | c.-1417T>C | Dd2, Dd2Polδ-F11                          | NO                                  |                                  |

**Supplementary Table 4. Summary of unsuccessful MMV665794 selections using wild type 3D7 and Dd2 strains.**

| <b>Parasite line</b> | <b>Selection method</b>                                                         | <b>Outcome</b>          |
|----------------------|---------------------------------------------------------------------------------|-------------------------|
| 3D7-WT               | Constant pressure at 3xIC <sub>50</sub> for 45 days                             | No parasites reappeared |
| 3D7-WT               | Constant pressure at 1.5xIC <sub>50</sub> for 45 days                           | No parasites reappeared |
| Dd2-WT               | Constant pressure at 3xIC <sub>50</sub> for 45 days                             | No parasites reappeared |
| Dd2-WT               | Ramp up/on-off starting at 1xIC <sub>50</sub> or 3xIC <sub>50</sub> for 45 days | No parasites reappeared |

**Supplementary Table 5. Single guide RNAs and sequencing primers for verifying CRISPR plasmid constructs and CRISPR-edited parasites.**

| Primer name                                                   | Sequences (5'-3')              |
|---------------------------------------------------------------|--------------------------------|
| SgRNA1 DNA pol $\delta$ D308A-E310A-F                         | TATTGAAGGATAAAAATTCTTAACTT     |
| SgRNA1 DNA pol $\delta$ D308A-E310A-R                         | AAACAAGTTAAGAATTTTATCCTTC      |
| SgRNA2 DNA pol $\delta$ D308A-E310A-F                         | TATTGTGTATAAAAATTAGACGGTAA     |
| SgRNA2 DNA pol $\delta$ D308A-E310A-R                         | AAACTTACCGTCTAATTTTATACAC      |
| p345-donor template-F for CRISPR plasmid sequencing           | GAGGTACCGAGCTCGAATTC           |
| p346-donor template-R for CRISPR plasmid sequencing           | CGAAAAGTGCCACCTGACGTC          |
| p35-gRNA sequencing-F for CRISPR plasmid sequencing           | AAGCACCGACTCGGTGCCAC           |
| p1629-gRNA sequencing-R for CRISPR plasmid sequencing         | GTGTAGTTAATTCATCAAATAGCATGCC   |
| p1495-PCR-CRISPR-edited-F for pol $\delta$ D308A-E310A        | GTTGAGAAACCTGATGATTTTGATAATG   |
| p1496-PCR-CRISPR-edited-R for pol $\delta$ D308A-E310A        | CCATCTAACTTAATACATGCTATAGC     |
| p1497-PCR-non-CRISPR-edited-R for pol $\delta$ D308A-E310A    | CCGTCTAATTTTATACATTCAATATCAAAG |
| p1510-sequencing-CRISPR-edited-R for pol $\delta$ D308A-E310A | GCGTACCAAACCTGTTTAGATGAGAAAC   |
| P1511-sequencing-CRISPR-edited-F for pol $\delta$ D308A-E310A | GATCATAAGATTACAGGTTTCATCCTGG   |
| SgRNA1 QRP1 G1612V-F                                          | TATTCATATTATAAGTCACTCATG       |
| SgRNA1 QRP1 G1612V-R                                          | AAACCATGAGTGACTTATAATATG       |
| SgRNA2 QRP1 G1612V-F                                          | TATTAATTGTCCTCTACACAACCTT      |
| SgRNA2 QRP1 G1612V-R                                          | AAACAAGTTGTGTAGAGGACAATT       |
| SgRNA1 QRP1 D1863Y-F                                          | TATTGTTTCTGAATATGTTAAAGCT      |
| SgRNA1 QRP1 D1863Y-R                                          | AAACAGCTTTAACATATTCAGAAAC      |
| SgRNA2 QRP1 D1863Y-F                                          | TATTCTTTAACATATTCAGAAACA       |
| SgRNA2 QRP1 D1863Y-R                                          | AAACTGTTTCTGAATATGTTAAAG       |
| Genotyping primer-F for G1612V/G1612 silent control           | CGATAGGTAATAAAAATGAGGAATTTG    |
| Genotyping primer-R for G1612V/G1612 silent control           | TAGTTAAGTTGTTACTCGAATGC        |
| Genotyping primer-F for D1863Y/D1863 silent control           | CATTCGAGTAACAACCTTAACTAATAG    |
| Genotyping primer-R for D1863Y/D1863 silent control           | CACTATCACAACTTTATACTGCT        |

**Supplementary Table 6. The unique and duplicate reads from WGS and % of genome having read depth > 10 and > 5.**

| Name           | Unique Reads | Duplicate Reads | % read depth >10 | % read depth >5 |
|----------------|--------------|-----------------|------------------|-----------------|
| Dd2-1-1        | 14769170     | 3040808         | 99.51            | 99.97           |
| Dd2-100-1      | 5952540      | 443763          | 93.77            | 98.15           |
| Dd2-20-1       | 15066292     | 3025525         | 99.45            | 99.93           |
| Dd2-20-2       | 18609611     | 5016444         | 99.06            | 99.85           |
| Dd2-40-1       | 8481909      | 999102          | 96.19            | 99.14           |
| Dd2-40-2       | 6611272      | 561438          | 90.98            | 96.94           |
| Dd2-40-3       | 7287968      | 664877          | 96.24            | 99.05           |
| Dd2-60-1       | 7565158      | 792763          | 94.56            | 98.42           |
| Dd2-60-2       | 7069327      | 639142          | 94.45            | 98.59           |
| Dd2-60-3       | 7542181      | 738795          | 94.66            | 98.55           |
| Dd2-80-1       | 7264230      | 773332          | 92.46            | 97.59           |
| Dd2-80-2       | 7138064      | 716103          | 90.91            | 96.79           |
| Dd2-80-3       | 6463084      | 522766          | 92.23            | 97.64           |
| poldmE8-1-1    | 5893083      | 607360          | 88.25            | 95.36           |
| poldmE8-100-1  | 7800072      | 760535          | 98.14            | 99.62           |
| poldmE8-20-2   | 7730155      | 823145          | 94.99            | 98.57           |
| poldmE8-20-3   | 7038999      | 584647          | 96.26            | 99.11           |
| poldmE8-40-1   | 6884270      | 647710          | 92.14            | 97.51           |
| poldmE8-40-2   | 6473538      | 523251          | 92.57            | 97.63           |
| poldmE8-40-3   | 8126877      | 934113          | 93.89            | 98.32           |
| poldmE8-60-1   | 6006496      | 448769          | 92.93            | 97.91           |
| poldmE8-60-2   | 6946042      | 640212          | 94.67            | 98.62           |
| poldmE8-60-3   | 6130348      | 541556          | 90.71            | 96.87           |
| poldmE8-80-1   | 5835502      | 412587          | 92.51            | 97.56           |
| poldmE8-80-2   | 6587823      | 569450          | 93.74            | 98.11           |
| poldmE8-80-3   | 5946965      | 475073          | 92.20            | 97.55           |
| poldmF11-1-1   | 6057568      | 528834          | 88.28            | 95.65           |
| poldmF11-100-1 | 8319731      | 1161991         | 95.26            | 98.86           |
| poldmF11-100-2 | 6648267      | 551164          | 96.02            | 99.15           |
| poldmF11-100-3 | 7669947      | 836794          | 95.24            | 98.70           |
| poldmF11-20-1  | 5791224      | 456442          | 89.21            | 95.92           |
| poldmF11-20-2  | 6964323      | 650971          | 94.51            | 98.44           |
| poldmF11-20-3  | 6318404      | 508672          | 94.27            | 98.44           |
| poldmF11-40-1  | 8427775      | 1058351         | 95.83            | 98.99           |
| poldmF11-40-2  | 7498668      | 658184          | 95.81            | 98.85           |
| poldmF11-60-1  | 6292506      | 475844          | 95.46            | 98.82           |
| poldmF11-60-2  | 6182210      | 501781          | 92.66            | 97.82           |
| poldmF11-60-3  | 7532574      | 911423          | 92.20            | 97.59           |
| poldmF11-80-1  | 6659100      | 674351          | 89.43            | 96.02           |
| poldmF11-80-2  | 7318953      | 718796          | 94.61            | 98.44           |
| poldmF11-80-3  | 7160713      | 632422          | 94.92            | 98.59           |
| poldmH11-1-1   | 6420885      | 538333          | 92.05            | 97.42           |
| poldmH11-100-1 | 6625345      | 621906          | 93.61            | 98.06           |
| poldmH11-20-1  | 7736958      | 828564          | 94.72            | 98.50           |
| poldmH11-20-2  | 6048678      | 497831          | 89.92            | 96.62           |
| poldmH11-20-3  | 6914208      | 657475          | 93.37            | 97.94           |
| poldmH11-40-1  | 6707343      | 563439          | 94.73            | 98.63           |



| Name                      | Unique Reads | Duplicate Reads | % read depth >10 | % read depth >5 |
|---------------------------|--------------|-----------------|------------------|-----------------|
| poldmH11-40-2             | 7023534      | 646913          | 94.57            | 98.39           |
| poldmH11-40-3             | 6702375      | 612303          | 91.32            | 97.10           |
| poldmH11-60-1             | 9004269      | 1079027         | 96.28            | 98.99           |
| poldmH11-60-2             | 6633479      | 570458          | 93.89            | 98.09           |
| poldmH11-60-3             | 7124799      | 662045          | 95.13            | 98.67           |
| poldmH11-80-1             | 6170512      | 538337          | 90.39            | 96.58           |
| poldmH11-nodrug-F1        | 7686874      | 828749          | 95.52            | 98.90           |
| poldmH11-nodrug-F2        | 6745022      | 622075          | 94.28            | 98.53           |
| poldmH11-nodrug-F3        | 6424501      | 557473          | 95.66            | 98.92           |
| poldmH11-MMV665794-clone1 | 7724812      | 927771          | 95.27            | 98.86           |
| poldmH11-MMV665794-clone2 | 5886563      | 464846          | 90.49            | 96.91           |
| poldmH11-MMV665794-clone3 | 6805012      | 686455          | 93.56            | 98.08           |
| poldmH11-MMV665794-clone4 | 6424965      | 579556          | 91.97            | 97.43           |
| poldmH11-MMV665794-clone5 | 8110864      | 1005500         | 94.41            | 98.57           |
| poldmH11-KAE609-clone1    | 7238083      | 791409          | 93.81            | 98.07           |
| poldmH11-KAE609-clone2    | 6595094      | 709986          | 89.44            | 96.41           |
| poldmH11-KAE609-clone3    | 6482554      | 623836          | 90.98            | 97.12           |
